# Supplementary material for: Predicting rejection of emerging contaminants through RO membrane filtration based on ANN-QSAR modeling approach: trends in molecular descriptors and structures towards rejections
Source: Royal Society of Chemistry journal article supplement (doi:10.1039/d3ra03177b), 2023-01-01
Supplement: d3ra03177b2.pdf [file d3ra03177b2.pdf]

## **Predicting Rejection of Emerging Contaminants through RO Membrane Filtration based on ANN- QSAR Modelling Approach: Trends in Molecular Descriptors and Structures towards Rejections**

For submission to: **RSC Advances**

By Setare Loh Mousavi, S. Maryam Sajjadi\*

### **\*\*Correspondence Author**

S. Maryam Sajjadi:

E-mail: [sajjadi@semnan.ac.ir](mailto:sajjadi@semnan.ac.ir)

Tel. (+98) 23 – 31533192

Fax: (+98) 23 33384110

*Faculty of Chemistry, Semnan University, Semnan, Iran*

Contents:

Table S-1: The relationship between molecular descriptors and structural compounds used in modelling

Table S-1: Molecular descriptors and structural compounds used in QSAR modelling and the experimental and predicted rejection of molecules (associated with %relative error) by ANN analysis

| ID | abbrev.     | structure                                                                           | ESpm14u | R2e   | SIC1  | EEig03d | Rejection (Exp)* | Rejection (ANN) |
|----|-------------|-------------------------------------------------------------------------------------|---------|-------|-------|---------|------------------|-----------------|
| 1  | 1,1,1,2-TCA | 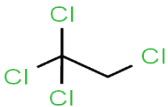   | 15.777  | 1.981 | 0.583 | -0.17   | 99<br>(±0.9)     | 94.1            |
| 2  | 1,1,1-TCA   |    | 15.381  | 2     | 0.604 | -0.17   | 98<br>(±1.1)     | 93.1            |
| 3  | 1,1,2,2-TCA |    | 13.17   | 1.954 | 0.5   | 0.2     | 97<br>(±1.0)     | 96.6            |
| 4  | 1,1,2-TCA   |    | 10.852  | 1.913 | 0.604 | 0.2     | 86<br>(±2.0)     | 81.1            |
| 5  | 1,1-DCA     |   | 9.704   | 1.924 | 0.583 | -0.69   | 80<br>(±2.0)     | 83.7            |
| 6  | 1,1-DCE     |  | 9.704   | 0.792 | 0.742 | -0.69   | 17<br>(±9.0)     | 19.2            |
| 7  | 1,1-DCP     |  | 10.852  | 1.452 | 0.763 | 0.2     | 45<br>(±2.2)     | 51.9            |
| 8  | 1,2,3-TCB   |  | 14.972  | 0.884 | 0.558 | 1.92    | 91<br>(±3.3)     | 87.2            |
| 9  | 1,2,3-TCP   |  | 11.685  | 1.8   | 0.517 | 1.26    | 95<br>(±1.4)     | 96.4            |
| 10 | 1,2,4-TCB   |  | 14.473  | 0.888 | 0.558 | 2.13    | 79<br>(±6.1)     | 88.0            |

| ID | abbrev.     | structure                                                                           | ESpm14u | R2e   | SIC1  | EEig03d | Rejection (Exp)* | Rejection (ANN) |
|----|-------------|-------------------------------------------------------------------------------------|---------|-------|-------|---------|------------------|-----------------|
| 11 | 1,2,4-TMB   | 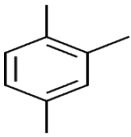   | 14.473  | 1.642 | 0.485 | 1.63    | 97<br>(±1.3)     | 97.6            |
| 12 | 1,2-DB-3-CP |    | 11.685  | 1.675 | 0.642 | 1.50    | 97<br>(±1.1)     | 87.1            |
| 13 | EDB         |    | 5.549   | 1.743 | 0.5   | -0.85   | 40<br>(±3.9)     | 39.1            |
| 14 | 1,2-DCB     |    | 14.084  | 0.902 | 0.535 | 1.53    | 83<br>(±5.3)     | 78.9            |
| 15 | 1,2-DCA     |    | 5.549   | 1.89  | 0.5   | -0.83   | 34<br>(±4.1)     | 38.2            |
| 16 | 1,2-DCP     |    | 10.852  | 1.861 | 0.54  | -0.28   | 91<br>(±1.6)     | 82.6            |
| 17 | 1,3,5-TMB   |  | 14.094  | 1.722 | 0.485 | 2.14    | 99<br>(±0.4)     | 89.2            |
| 18 | 1,3-DCB     |  | 13.393  | 0.902 | 0.535 | 1.31    | 71<br>(±7.5)     | 70.0            |
| 19 | 1,3-DCP     |  | 7.431   | 1.843 | 0.487 | 0.24    | 71<br>(±2.6)     | 60.2            |
| 20 | 1,4-DCB     |  | 13.23   | 0.908 | 0.535 | 1       | 59<br>(±7.9)     | 62.5            |
| 21 | 1,4-D       |  | 10.397  | 2.388 | 0.362 | 1.34    | 98<br>(±0.7)     | 98.5            |
| 22 | 2-But       |  | 10.852  | 1.881 | 0.501 | 0.17    | 73<br>(±2.7)     | 86.1            |

| ID | abbrev. | structure                                                                           | ESpm14u | R2e   | SIC1  | EEig03d | Rejection (Exp)* | Rejection (ANN) |
|----|---------|-------------------------------------------------------------------------------------|---------|-------|-------|---------|------------------|-----------------|
| 23 | 2-CT    | 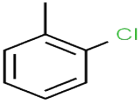   | 14.084  | 1.418 | 0.646 | 1.48    | 88<br>(±4.0)     | 86.7            |
| 24 | 2-Hex   |    | 11.259  | 1.805 | 0.442 | 0.73    | 83<br>(±2.6)     | 93.8            |
| 25 | 4-CT    |    | 13.23   | 1.454 | 0.646 | 1       | 67<br>(±6.9)     | 71.0            |
| 26 | 4-IPT   |    | 14.328  | 1.704 | 0.516 | 1.29    | 98<br>(±0.6)     | 96.6            |
| 27 | MIBK    |    | 12.358  | 1.863 | 0.442 | 0.63    | 98<br>(±0.8)     | 95.9            |
| 28 | acetone |   | 9.704   | 1.775 | 0.473 | -0.32   | 55<br>(±3.8)     | 65.2            |
| 29 | Ace-N   |  | 1.099   | 1.597 | 0.693 | 0       | 23<br>(±10.6)    | 19.1            |
| 30 | Acr-N   |  | 5.549   | 0.616 | 0.758 | -0.64   | 18<br>(±8.1)     | 7.5             |
| 31 | benzene |  | 10.397  | 0.944 | 0.279 | 1       | 79<br>(±1.9)     | 76.3            |
| 32 | BB      |  | 12.41   | 0.893 | 0.46  | 1       | 59<br>(±6.9)     | 67.1            |
| 33 | BCM     |  | 1.099   | 2.13  | 0.828 | 0       | 25<br>(±4.1)     | 20.2            |
| 34 | BDCM    |  | 9.704   | 2.221 | 0.828 | 0.2     | 82<br>(±2.0)     | 80.4            |
| 35 | BF      |  | 9.704   | 1.95  | 0.59  | 0.48    | 85<br>(±3.3)     | 75.0            |

| ID | abbrev.     | structure                                                                           | ESpm14u | R2e   | SIC1  | EEig03d | Rejection (Exp)* | Rejection (ANN) |
|----|-------------|-------------------------------------------------------------------------------------|---------|-------|-------|---------|------------------|-----------------|
| 36 | BM          | 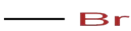   | 0       | 2.091 | 0.59  | 0       | 0<br>(±0.0)      | 9.7             |
| 37 | C-Tet       |    | 15.381  | 2.527 | 0.311 | -0.17   | 97<br>(-)        | 98.8            |
| 38 | CB          |    | 12.41   | 0.922 | 0.46  | 1       | 63<br>(±4.8)     | 67.5            |
| 39 | CA          |    | 1.099   | 1.884 | 0.516 | 0       | 15<br>(±3.6)     | 12.8            |
| 40 | CF          |    | 9.704   | 2.381 | 0.59  | -0.17   | 73<br>(±2.4)     | 91.9            |
| 41 | CM          |    | 0       | 2.237 | 0.59  | 0       | 4<br>(±1.5)      | 12.8            |
| 42 | cis-1,2-DCE |   | 5.549   | 0.759 | 0.613 | -0.83   | 11<br>(±3.8)     | 13.4            |
| 43 | cis-1,3-DCP |  | 7.431   | 1.514 | 0.86  | 0.47    | 48<br>(±2.6)     | 35.8            |
| 44 | DBCM        |  | 9.704   | 2.078 | 0.828 | 0.48    | 78<br>(±3.0)     | 74.2            |
| 45 | DBM         |  | 1.099   | 1.993 | 0.655 | 0       | 25<br>(±2.7)     | 10.9            |
| 46 | EB          |  | 12.869  | 1.687 | 0.536 | 1       | 87<br>(±3.9)     | 92.1            |
| 47 | HCBD        |  | 15.148  | 1.118 | 0.413 | 2.28    | >96<br>(±1.6)    | 95.7            |
| 48 | IPA         |  | 9.704   | 1.737 | 0.497 | -1      | 91<br>(±2.7)     | 83.6            |
| ID | abbrev.     | structure                                                                           | ESpm14u | R2e   | SIC1  | EEig03d | Rejection        | Rejection       |

|    |           |                                                                                     |        |       |       |        | (Exp)*       | (ANN) |
|----|-----------|-------------------------------------------------------------------------------------|--------|-------|-------|--------|--------------|-------|
| 49 | cumene    | 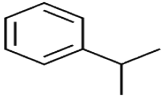   | 14.087 | 1.637 | 0.514 | 1      | 97<br>(±0.9) | 94.7  |
| 50 | IPE       |    | 12.358 | 1.899 | 0.314 | -0.048 | 99<br>(±0.7) | 97.3  |
| 51 | MTBE      |    | 15.777 | 1.824 | 0.364 | -0.80  | 99<br>(±0.5) | 97.6  |
| 52 | MC        |    | 1.099  | 2.282 | 0.655 | 0      | 10<br>(±5.0) | 14.8  |
| 53 | m-xylenes |    | 13.393 | 1.578 | 0.527 | 1.22   | 88<br>(±3.9) | 93.9  |
| 54 | p-xylenes |    | 13.23  | 1.573 | 0.527 | 1      | 88<br>(±3.9) | 91.3  |
| 55 | Naph      |   | 14.73  | 0.961 | 0.334 | 1.61   | 91<br>(±3.0) | 89.0  |
| 56 | n-BB      |  | 12.996 | 1.716 | 0.512 | 1.30   | 90<br>(±3.5) | 95.8  |
| 57 | n-PB      |  | 12.969 | 1.727 | 0.535 | 1      | 88<br>(±3.5) | 93.2  |
| 58 | o-xylene  |  | 14.084 | 1.514 | 0.527 | 1.46   | 96<br>(±1.8) | 95.5  |
| 59 | s-BB      |  | 14.301 | 1.71  | 0.512 | 1.15   | 98<br>(±0.9) | 96.4  |
| 60 | TAME      |  | 16.127 | 1.919 | 0.371 | 0.38   | 99<br>(±0.6) | 98.8  |

| ID | abbrev.   | Structure                                                                           | ESpm14u | R2e   | SIC1  | EEig03d | Rejection (Exp)* | Rejection (ANN) |
|----|-----------|-------------------------------------------------------------------------------------|---------|-------|-------|---------|------------------|-----------------|
| 61 | TBA       | 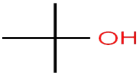   | 15.381  | 1.592 | 0.432 | -1      | 99<br>(±0.3)     | 95.6            |
| 62 | TBEE      |    | 15.824  | 1.851 | 0.335 | -0.21   | 99<br>(±0.4)     | 98.6            |
| 63 | TBB       |    | 16.758  | 1.623 | 0.487 | 1.20    | >96<br>(±1.4)    | 98.0            |
| 64 | PCE       |    | 13.17   | 0.754 | 0.355 | 0.2     | 83<br>(±5.5)     | 82.0            |
| 65 | toluene   |    | 12.41   | 1.441 | 0.523 | 1       | 82<br>(±3.8)     | 86.0            |
| 66 | t-1,2-DCE |   | 5.549   | 0.766 | 0.613 | -0.83   | 15<br>(±5.3)     | 13.4            |
| 67 | t-1,3-DCP |  | 7.431   | 1.453 | 0.86  | 0.47    | 27<br>(±3.8)     | 39.2            |
| 68 | t-1,4-DCB |  | 8.384   | 1.599 | 0.628 | 0.98    | 51<br>(±4.0)     | 52.3            |
| 69 | TCE       |  | 10.852  | 0.786 | 0.693 | 0.2     | 46<br>(±2.9)     | 42.8            |
| 70 | VA        |  | 11.149  | 1.663 | 0.779 | 0.51    | 46<br>(±10.8)    | 49.3            |
| 71 | VC        |  | 1.099   | 0.764 | 0.693 | 0       | 17<br>(±3.9)     | 19.4            |
| 72 | styrene   |  | 12.869  | 1.259 | 0.444 | 1       | 75<br>(±5.7)     | 86.6            |

\*The standard deviation of the experimental rejection data has been reported in the parenthesis.
