# Supplementary material for: Predicting rejection of emerging contaminants through RO membrane filtration based on ANN-QSAR modeling approach: trends in molecular descriptors and structures towards rejections
Source: RSC Adv. 2023 Aug 8;13(34):23754–71. doi: 10.1039/d3ra03177b (PMC10407621; doi:10.1039/d3ra03177b)
Supplement: RA-013-D3RA03177B-s001 [file RA-013-D3RA03177B-s001.xlsx]

## Sheet: average M
No.	Rejection	MW	AMW	Sv	Se	Sp	Ss	Mv	Me	Mp	Ms	nAT	nSK	nBT	nBO	nBM	SCBO	ARR	nCIC	nCIR	RBN	RBF	nDB	nTB	nAB	nH	nC	nN	nO	nP	nS	nF	nCL	nBR	nI	nB	nHM	nX	nR03	nR04	nR05	nR06	nR07	nR08	nR09	nR10	nR11	nR12	nBnz
1	99	167.84	20.98	6.6	8.95	7.72	19.19	0.82	1.12	0.96	3.2	8	6	7	5	0	5	0	0	0	0	0	0	0	0	2	2	0	0	0	0	0	4	0	0	0	0	4	0	0	0	0	0	0	0	0	0	0	0
2	98	133.4	16.67	5.9	8.62	6.86	15.58	0.74	1.08	0.86	3.12	8	5	7	4	0	4	0	0	0	0	0	0	0	0	3	2	0	0	0	0	0	3	0	0	0	0	3	0	0	0	0	0	0	0	0	0	0	0
3	97	167.84	20.98	6.6	8.95	7.72	19.11	0.82	1.12	0.96	3.19	8	6	7	5	0	5	0	0	0	0	0	0	0	0	2	2	0	0	0	0	0	4	0	0	0	0	4	0	0	0	0	0	0	0	0	0	0	0
4	86	133.4	16.67	5.9	8.62	6.86	15.17	0.74	1.08	0.86	3.03	8	5	7	4	0	4	0	0	0	0	0	0	0	0	3	2	0	0	0	0	0	3	0	0	0	0	3	0	0	0	0	0	0	0	0	0	0	0
5	80	98.96	12.37	5.2	8.3	6	11.56	0.65	1.04	0.75	2.89	8	4	7	3	0	3	0	0	0	0	0	0	0	0	4	2	0	0	0	0	0	2	0	0	0	0	2	0	0	0	0	0	0	0	0	0	0	0
6	17	96.94	16.16	4.6	6.41	5.24	12.89	0.77	1.07	0.87	3.22	6	4	5	3	1	4	0	0	0	0	0	1	0	0	2	2	0	0	0	0	0	2	0	0	0	0	2	0	0	0	0	0	0	0	0	0	0	0
7	45	110.97	12.33	6.2	9.3	7	13.89	0.69	1.03	0.78	2.78	9	5	8	4	1	5	0	0	0	0	0	1	0	0	4	3	0	0	0	0	0	2	0	0	0	0	2	0	0	0	0	0	0	0	0	0	0	0
8	91	181.44	15.12	9.9	12.62	10.86	23.33	0.82	1.05	0.9	2.59	12	9	12	9	6	12	0.667	1	1	0	0	0	0	6	3	6	0	0	0	0	0	3	0	0	0	0	3	0	0	0	1	0	0	0	0	0	0	1
9	95	147.43	13.4	7.49	11.51	8.62	16.67	0.68	1.05	0.78	2.78	11	6	10	5	0	5	0	0	0	0	0	0	0	0	5	3	0	0	0	0	0	3	0	0	0	0	3	0	0	0	0	0	0	0	0	0	0	0
10	79	181.44	15.12	9.9	12.62	10.86	23.33	0.82	1.05	0.9	2.59	12	9	12	9	6	12	0.667	1	1	0	0	0	0	6	3	6	0	0	0	0	0	3	0	0	0	0	3	0	0	0	1	0	0	0	0	0	0	1
11	97	120.21	5.72	12.59	20.3	13.57	17	0.6	0.97	0.65	1.89	21	9	21	9	6	12	0.667	1	1	0	0	0	0	6	12	9	0	0	0	0	0	0	0	0	0	0	0	0	0	0	1	0	0	0	0	0	0	1
12	97	236.33	21.48	8.26	11.32	9.61	13.94	0.75	1.03	0.87	2.32	11	6	10	5	0	5	0	0	0	0	0	0	0	0	5	3	0	0	0	0	0	1	2	0	0	0	3	0	0	0	0	0	0	0	0	0	0	0
13	40	187.86	23.48	5.96	8.11	6.99	8.5	0.75	1.01	0.87	2.13	8	4	7	3	0	3	0	0	0	0	0	0	0	0	4	2	0	0	0	0	0	0	2	0	0	0	2	0	0	0	0	0	0	0	0	0	0	0
14	83	147	12.25	9.2	12.3	10	19.56	0.77	1.02	0.83	2.44	12	8	12	8	6	11	0.75	1	1	0	0	0	0	6	4	6	0	0	0	0	0	2	0	0	0	0	2	0	0	0	1	0	0	0	0	0	0	1
15	34	98.96	12.37	5.2	8.3	6	11.22	0.65	1.04	0.75	2.81	8	4	7	3	0	3	0	0	0	0	0	0	0	0	4	2	0	0	0	0	0	2	0	0	0	0	2	0	0	0	0	0	0	0	0	0	0	0
16	91	112.99	10.27	6.79	11.18	7.76	13.06	0.62	1.02	0.71	2.61	11	5	10	4	0	4	0	0	0	0	0	0	0	0	6	3	0	0	0	0	0	2	0	0	0	0	2	0	0	0	0	0	0	0	0	0	0	0
17	99	120.21	5.72	12.59	20.3	13.57	17	0.6	0.97	0.65	1.89	21	9	21	9	6	12	0.667	1	1	0	0	0	0	6	12	9	0	0	0	0	0	0	0	0	0	0	0	0	0	0	1	0	0	0	0	0	0	1
18	71	147	12.25	9.2	12.3	10	19.56	0.77	1.02	0.83	2.44	12	8	12	8	6	11	0.75	1	1	0	0	0	0	6	4	6	0	0	0	0	0	2	0	0	0	0	2	0	0	0	1	0	0	0	0	0	0	1
19	71	112.99	10.27	6.79	11.18	7.76	12.72	0.62	1.02	0.71	2.54	11	5	10	4	0	4	0	0	0	0	0	0	0	0	6	3	0	0	0	0	0	2	0	0	0	0	2	0	0	0	0	0	0	0	0	0	0	0
20	59	147	12.25	9.2	12.3	10	19.56	0.77	1.02	0.83	2.44	12	8	12	8	6	11	0.75	1	1	0	0	0	0	6	4	6	0	0	0	0	0	2	0	0	0	0	2	0	0	0	1	0	0	0	0	0	0	1
21	98	88.12	6.29	7.41	14.19	7.95	13	0.53	1.01	0.57	2.17	14	6	14	6	0	6	0	1	1	0	0	0	0	0	8	4	0	2	0	0	0	0	0	0	0	0	0	0	0	0	1	0	0	0	0	0	0	0
22	73	72.12	5.55	6.9	12.86	7.5	14.17	0.53	0.99	0.58	2.83	13	5	12	4	1	5	0	0	0	1	0.083	1	0	0	8	4	0	1	0	0	0	0	0	0	0	0	0	0	0	0	0	0	0	0	0	0	0	0
23	88	126.59	8.44	10.09	14.86	10.9	17.44	0.67	0.99	0.73	2.18	15	8	15	8	6	11	0.75	1	1	0	0	0	0	6	7	7	0	0	0	0	0	1	0	0	0	0	1	0	0	0	1	0	0	0	0	0	0	1
24	83	100.18	5.27	10.1	18.63	11.02	17.17	0.53	0.98	0.58	2.45	19	7	18	6	1	7	0	0	0	3	0.167	1	0	0	12	6	0	1	0	0	0	0	0	0	0	0	0	0	0	0	0	0	0	0	0	0	0	0
25	67	126.59	8.44	10.09	14.86	10.9	17.44	0.67	0.99	0.73	2.18	15	8	15	8	6	11	0.75	1	1	0	0	0	0	6	7	7	0	0	0	0	0	1	0	0	0	0	1	0	0	0	1	0	0	0	0	0	0	1
26	98	134.24	5.59	14.18	23.19	15.33	18.67	0.59	0.97	0.64	1.87	24	10	24	10	6	13	0.6	1	1	1	0.042	0	0	6	14	10	0	0	0	0	0	0	0	0	0	0	0	0	0	0	1	0	0	0	0	0	0	1
27	98	100.18	5.27	10.1	18.63	11.02	17.5	0.53	0.98	0.58	2.5	19	7	18	6	1	7	0	0	0	2	0.111	1	0	0	12	6	0	1	0	0	0	0	0	0	0	0	0	0	0	0	0	0	0	0	0	0	0	0
28	55	58.09	5.81	5.31	9.98	5.74	12.67	0.53	1	0.57	3.17	10	4	9	3	1	4	0	0	0	0	0	1	0	0	6	3	0	1	0	0	0	0	0	0	0	0	0	0	0	0	0	0	0	0	0	0	0	0
29	23	41.06	6.84	3.59	5.99	3.77	10.5	0.6	1	0.63	3.5	6	3	5	2	1	4	0	0	0	0	0	0	1	0	3	2	1	0	0	0	0	0	0	0	0	0	0	0	0	0	0	0	0	0	0	0	0	0
30	18	53.07	7.58	4.59	6.99	4.77	13.5	0.66	1	0.68	3.38	7	4	6	3	2	6	0	0	0	0	0	1	1	0	3	3	1	0	0	0	0	0	0	0	0	0	0	0	0	0	0	0	0	0	0	0	0	0
31	79	78.12	6.51	7.79	11.65	8.28	12	0.65	0.97	0.69	2	12	6	12	6	6	9	1	1	1	0	0	0	0	6	6	6	0	0	0	0	0	0	0	0	0	0	0	0	0	0	1	0	0	0	0	0	0	1
32	59	157.01	13.08	8.88	11.88	9.64	14.42	0.74	0.99	0.8	2.06	12	7	12	7	6	10	0.857	1	1	0	0	0	0	6	5	6	0	0	0	0	0	0	1	0	0	0	1	0	0	0	1	0	0	0	0	0	0	1
33	25	129.38	25.88	3.98	5.32	4.73	8.36	0.8	1.06	0.95	2.79	5	3	4	2	0	2	0	0	0	0	0	0	0	0	2	1	0	0	0	0	0	1	1	0	0	0	2	0	0	0	0	0	0	0	0	0	0	0
34	82	163.82	32.76	4.68	5.64	5.59	12.31	0.94	1.13	1.12	3.08	5	4	4	3	0	3	0	0	0	0	0	0	0	0	1	1	0	0	0	0	0	2	1	0	0	0	3	0	0	0	0	0	0	0	0	0	0	0
35	85	252.72	50.54	5.45	5.45	6.58	9.58	1.09	1.09	1.32	2.4	5	4	4	3	0	3	0	0	0	0	0	0	0	0	1	1	0	0	0	0	0	0	3	0	0	0	3	0	0	0	0	0	0	0	0	0	0	0
36	0	94.94	18.99	3.28	5	3.88	4.75	0.66	1	0.78	2.38	5	2	4	1	0	1	0	0	0	0	0	0	0	0	3	1	0	0	0	0	0	0	1	0	0	0	1	0	0	0	0	0	0	0	0	0	0	0
37	97	153.81	30.76	5	6.06	5.95	17.69	1	1.21	1.19	3.54	5	5	4	4	0	4	0	0	0	0	0	0	0	0	0	1	0	0	0	0	0	4	0	0	0	0	4	0	0	0	0	0	0	0	0	0	0	0
38	63	112.56	9.38	8.49	11.97	9.14	15.78	0.71	1	0.76	2.25	12	7	12	7	6	10	0.857	1	1	0	0	0	0	6	5	6	0	0	0	0	0	1	0	0	0	0	1	0	0	0	1	0	0	0	0	0	0	1
39	15	64.52	8.07	4.49	7.97	5.14	7.61	0.56	1	0.64	2.54	8	3	7	2	0	2	0	0	0	0	0	0	0	0	5	2	0	0	0	0	0	1	0	0	0	0	1	0	0	0	0	0	0	0	0	0	0	0
40	73	119.37	23.87	4.3	5.74	5.1	13.67	0.86	1.15	1.02	3.42	5	4	4	3	0	3	0	0	0	0	0	0	0	0	1	1	0	0	0	0	0	3	0	0	0	0	3	0	0	0	0	0	0	0	0	0	0	0
41	4	50.49	10.1	2.9	5.09	3.38	6.11	0.58	1.02	0.68	3.06	5	2	4	1	0	1	0	0	0	0	0	0	0	0	3	1	0	0	0	0	0	1	0	0	0	0	1	0	0	0	0	0	0	0	0	0	0	0
42	11	96.94	16.16	4.6	6.41	5.24	12.22	0.77	1.07	0.87	3.06	6	4	5	3	1	4	0	0	0	0	0	1	0	0	2	2	0	0	0	0	0	2	0	0	0	0	2	0	0	0	0	0	0	0	0	0	0	0
43	48	110.97	12.33	6.2	9.3	7	13.72	0.69	1.03	0.78	2.74	9	5	8	4	1	5	0	0	0	0	0	1	0	0	4	3	0	0	0	0	0	2	0	0	0	0	2	0	0	0	0	0	0	0	0	0	0	0
44	78	208.27	41.65	5.07	5.55	6.09	10.94	1.01	1.11	1.22	2.74	5	4	4	3	0	3	0	0	0	0	0	0	0	0	1	1	0	0	0	0	0	1	2	0	0	0	3	0	0	0	0	0	0	0	0	0	0	0
45	25	173.83	34.77	4.36	5.23	5.23	7	0.87	1.05	1.05	2.33	5	3	4	2	0	2	0	0	0	0	0	0	0	0	2	1	0	0	0	0	0	0	2	0	0	0	2	0	0	0	0	0	0	0	0	0	0	0
46	87	106.18	5.9	10.99	17.42	11.81	15.17	0.61	0.97	0.66	1.9	18	8	18	8	6	11	0.75	1	1	1	0.056	0	0	6	10	8	0	0	0	0	0	0	0	0	0	0	0	0	0	0	1	0	0	0	0	0	0	1
47	96	260.74	26.07	10	11.59	11.43	31.33	1	1.16	1.14	3.13	10	10	9	9	2	11	0	0	0	1	0.111	2	0	0	0	4	0	0	0	0	0	6	0	0	0	0	6	0	0	0	0	0	0	0	0	0	0	0
48	91	60.11	5.01	5.9	11.86	6.5	11.33	0.49	0.99	0.54	2.83	12	4	11	3	0	3	0	0	0	0	0	0	0	0	8	3	0	1	0	0	0	0	0	0	0	0	0	0	0	0	0	0	0	0	0	0	0	0
49	97	120.21	5.72	12.59	20.3	13.57	17	0.6	0.97	0.65	1.89	21	9	21	9	6	12	0.667	1	1	1	0.048	0	0	6	12	9	0	0	0	0	0	0	0	0	0	0	0	0	0	0	1	0	0	0	0	0	0	1
50	99	102.2	4.87	10.7	20.51	11.78	14.17	0.51	0.98	0.56	2.02	21	7	20	6	0	6	0	0	0	2	0.1	0	0	0	14	6	0	1	0	0	0	0	0	0	0	0	0	0	0	0	0	0	0	0	0	0	0	0
51	99	88.17	4.9	9.1	17.63	10.02	12.75	0.51	0.98	0.56	2.13	18	6	17	5	0	5	0	0	0	1	0.059	0	0	0	12	5	0	1	0	0	0	0	0	0	0	0	0	0	0	0	0	0	0	0	0	0	0	0
52	10	84.93	16.99	3.6	5.41	4.24	9.72	0.72	1.08	0.85	3.24	5	3	4	2	0	2	0	0	0	0	0	0	0	0	2	1	0	0	0	0	0	2	0	0	0	0	2	0	0	0	0	0	0	0	0	0	0	0
53	88	106.18	5.9	10.99	17.42	11.81	15.33	0.61	0.97	0.66	1.92	18	8	18	8	6	11	0.75	1	1	0	0	0	0	6	10	8	0	0	0	0	0	0	0	0	0	0	0	0	0	0	1	0	0	0	0	0	0	1
54	88	106.18	5.9	10.99	17.42	11.81	15.33	0.61	0.97	0.66	1.92	18	8	18	8	6	11	0.75	1	1	0	0	0	0	6	10	8	0	0	0	0	0	0	0	0	0	0	0	0	0	0	1	0	0	0	0	0	0	1
55	91	128.18	7.12	12.39	17.53	13.05	19.33	0.69	0.97	0.72	1.93	18	10	19	11	11	16.5	1	2	3	0	0	0	0	11	8	10	0	0	0	0	0	0	0	0	0	0	0	0	0	0	2	0	0	0	1	0	0	2
56	90	134.24	5.59	14.18	23.19	15.33	18.17	0.59	0.97	0.64	1.82	24	10	24	10	6	13	0.6	1	1	3	0.125	0	0	6	14	10	0	0	0	0	0	0	0	0	0	0	0	0	0	0	1	0	0	0	0	0	0	1
57	88	120.21	5.72	12.59	20.3	13.57	16.67	0.6	0.97	0.65	1.85	21	9	21	9	6	12	0.667	1	1	2	0.095	0	0	6	12	9	0	0	0	0	0	0	0	0	0	0	0	0	0	0	1	0	0	0	0	0	0	1
58	96	106.18	5.9	10.99	17.42	11.81	15.33	0.61	0.97	0.66	1.92	18	8	18	8	6	11	0.75	1	1	0	0	0	0	6	10	8	0	0	0	0	0	0	0	0	0	0	0	0	0	0	1	0	0	0	0	0	0	1
59	98	134.24	5.59	14.18	23.19	15.33	18.5	0.59	0.97	0.64	1.85	24	10	24	10	6	13	0.6	1	1	2	0.083	0	0	6	14	10	0	0	0	0	0	0	0	0	0	0	0	0	0	0	1	0	0	0	0	0	0	1
60	99	102.2	4.87	10.7	20.51	11.78	14.25	0.51	0.98	0.56	2.04	21	7	20	6	0	6	0	0	0	2	0.1	0	0	0	14	6	0	1	0	0	0	0	0	0	0	0	0	0	0	0	0	0	0	0	0	0	0	0
61	99	74.14	4.94	7.5	14.75	8.26	13.25	0.5	0.98	0.55	2.65	15	5	14	4	0	4	0	0	0	0	0	0	0	0	10	4	0	1	0	0	0	0	0	0	0	0	0	0	0	0	0	0	0	0	0	0	0	0
62	99	102.2	4.87	10.7	20.51	11.78	14.25	0.51	0.98	0.56	2.04	21	7	20	6	0	6	0	0	0	2	0.1	0	0	0	14	6	0	1	0	0	0	0	0	0	0	0	0	0	0	0	0	0	0	0	0	0	0	0
63	96	134.24	5.59	14.18	23.19	15.33	18.92	0.59	0.97	0.64	1.89	24	10	24	10	6	13	0.6	1	1	1	0.042	0	0	6	14	10	0	0	0	0	0	0	0	0	0	0	0	0	0	0	1	0	0	0	0	0	0	1
64	83	165.82	27.64	6	7.06	6.95	19.78	1	1.18	1.16	3.3	6	6	5	5	1	6	0	0	0	0	0	1	0	0	0	2	0	0	0	0	0	4	0	0	0	0	4	0	0	0	0	0	0	0	0	0	0	0
65	82	92.15	6.14	9.39	14.53	10.05	13.67	0.63	0.97	0.67	1.95	15	7	15	7	6	10	0.857	1	1	0	0	0	0	6	8	7	0	0	0	0	0	0	0	0	0	0	0	0	0	0	1	0	0	0	0	0	0	1
66	15	96.94	16.16	4.6	6.41	5.24	12.22	0.77	1.07	0.87	3.06	6	4	5	3	1	4	0	0	0	0	0	1	0	0	2	2	0	0	0	0	0	2	0	0	0	0	2	0	0	0	0	0	0	0	0	0	0	0
67	27	110.97	12.33	6.2	9.3	7	13.72	0.69	1.03	0.78	2.74	9	5	8	4	1	5	0	0	0	0	0	1	0	0	4	3	0	0	0	0	0	2	0	0	0	0	2	0	0	0	0	0	0	0	0	0	0	0
68	51	125	10.42	7.79	12.18	8.76	15.22	0.65	1.02	0.73	2.54	12	6	11	5	1	6	0	0	0	0	0	1	0	0	6	4	0	0	0	0	0	2	0	0	0	0	2	0	0	0	0	0	0	0	0	0	0	0
69	46	131.38	21.9	5.3	6.74	6.1	16	0.88	1.12	1.02	3.2	6	5	5	4	1	5	0	0	0	0	0	1	0	0	1	2	0	0	0	0	0	3	0	0	0	0	3	0	0	0	0	0	0	0	0	0	0	0
70	46	86.1	7.17	6.82	12.31	7.19	19.17	0.57	1.03	0.6	3.19	12	6	11	5	2	7	0	0	0	2	0.182	2	0	0	6	4	0	2	0	0	0	0	0	0	0	0	0	0	0	0	0	0	0	0	0	0	0	0
71	17	62.5	10.42	3.9	6.09	4.38	9.11	0.65	1.02	0.73	3.04	6	3	5	2	1	3	0	0	0	0	0	1	0	0	3	2	0	0	0	0	0	1	0	0	0	0	1	0	0	0	0	0	0	0	0	0	0	0
72	75	104.16	6.51	10.39	15.53	11.05	16.67	0.65	0.97	0.69	2.08	16	8	16	8	7	12	0.75	1	1	1	0.063	1	0	6	8	8	0	0	0	0	0	0	0	0	0	0	0	0	0	0	1	0	0	0	0	0	0	1
[truncated: 3,176 more columns]
